# Supplementary material for: https://2DMat.ChemDX.org: Experimental data platform for 2D materials from synthesis to physical properties
Source: Royal Society of Chemistry journal article supplement (doi:10.1039/d3dd00243h), 2024-01-01
Supplement: d3dd00243h1.pdf [file d3dd00243h1.pdf]

1 **Supplementary material for**

2 **2DMat.ChemDX.org: Experimental data platform for 2D materials**  
3 **from synthesis to physical properties**

4 Jin-Hoon Yang<sup>1</sup>, Habin Kang<sup>2,3</sup>, Taeho Kim<sup>2,3</sup>, Heonsu Ahn<sup>2,3</sup>, Hyuk Jin Kim<sup>4</sup>, Tae Gyu Rhee<sup>4,5</sup>,  
5 Yeong Gwang Khim<sup>4,5</sup>, Byoung Ki Choi<sup>4,6</sup>, Moon-Ho Jo<sup>2,3</sup>, Hyunju Chang<sup>1</sup>, Jonghwan Kim<sup>2,3,\*</sup>,  
6 Young Jun Chang<sup>4,5,7,\*</sup>, and Yea-Lee Lee<sup>1,\*</sup>

7 **Affiliations:**

- 8 1. Korea Research Institute of Chemical Technology, Daejeon 34114, Republic of Korea  
9 2. Department of Materials Science and Engineering, Pohang University of Science and Technology, Pohang 37673, Republic of Korea  
10 3. Center for van der Waals Quantum Solids, Institute for Basic Science, Pohang 37673, Republic of Korea  
11 4. Department of Physics, University of Seoul, Seoul 02504, Republic of Korea  
12 5. Department of Smart Cities, University of Seoul, Seoul 02504, Republic of Korea  
13 6. Advanced Light Source, Lawrence Berkeley National Laboratory, Berkeley, CA 94720, USA  
14 7. Department of Intelligent Semiconductor Engineering, University of Seoul, Seoul 02504, Republic of Korea

15 **Corresponding Authors:**

16 Jonghwan Kim (jonghwankim@postech.ac.kr)

17 Young Jun Chang (yjchang@uos.ac.kr)

18 Yea-Lee Lee (yealee@kriect.re.kr)

19

## 20 **In-situ RHEED acquisition during MBE growth and characterization**

21 2D thin films were grown on various substrates, such as graphene-covered SiC (001), Al<sub>2</sub>O<sub>3</sub> (0001), and SrTiO<sub>3</sub>,  
22 using a home-built MBE system in an ultrahigh vacuum (base pressure:  $1 \times 10^{-10}$  torr). We synthesized the 2D  
23 thin films by co-evaporating several sources using an electron-beam evaporator and a Knudsen cell while  
24 monitoring the film surface by in-situ RHEED. We captured still RHEED images before, during, and after the  
25 growth process and recorded RHEED videos in the “.mp4” format at a frame rate of 1 - 30 frames/sec.

26 The Raman spectroscopic measurements were performed using a 532 nm excitation laser source at room  
27 temperature. Scattered light from the samples was analyzed using a single-grating monochromator with a focal  
28 length of 50 cm and was detected by a liquid-nitrogen-cooled charge-coupled-device detector (LabRAM HR  
29 Evolution, HORIBA). AFM was performed to investigate the surface morphology under atmospheric conditions  
30 after the deposition (XE-100, Park system), and the samples were scanned in the non-contact mode. XPS  
31 measurements were carried out to examine the stoichiometry of the films (NEXSA, Thermo Fisher Scientific)

32

## 33 **Photoluminescence and Raman mapping database**

34 Raman/PL measurements were performed using a confocal microscope system (WITec alpha 300RS). A 532  
35 nm diode-pumped solid-state laser was directed through a  $\times 100$  objective lens with a numerical aperture of 0.9  
36 for focusing. To protect the sample from damage, a laser power of 50  $\mu$ W and an integration time of 0.1 seconds  
37 were applied during the PL and Raman mapping. To acquire the PL mapping data with different resolutions in  
38 the same area, several data were generated by varying the number of steps.

39

## 40 **Super-resolution of the spectral mapping data**

### 41 *Data structure*

42 The spectral mapping data is stored in a plain text file, wherein each record is structured as a two-dimensional  
43 matrix with dimensions represented by  $(M, N * N + 1)$ . This format indicates that there are  $M$  rows, with each  
44 row corresponding to a specific wavelength data point. Within each of these rows, the first column contains the  
45 actual value of the wavelength at that point, followed by  $N * N$  columns that document the intensity values  
46 across a grid of  $N$  by  $N$  pixels for that particular wavelength.

### 47 *Data processing*

48 Before utilizing the spectral mapping data in the image super-resolution model, it is crucial to first normalize  
49 the data. While the model is designed to process data within a fixed range, such as 0 to 1, the data can exhibit  
50 an infinite range of value. This normalization is especially important in adapting to varying intensity levels that  
51 may arise from different samples or laser powers. However, this process can unintentionally amplify noise

52 present in the data, which typically appear as exceedingly high intensity values compared to the true spectrum  
53 signals. If not addressed, this noise can be falsely identified as peak intensity during normalization, significantly  
54 diminishing the spectrum signals from sample.

55 To mitigate this problem, we use a histogram-based method to remove bright noise from the images, enabling  
56 us to find the real highest and lowest intensities from the data. This method involves grouping at least 100k  
57 values, structured as a grid, such as (1000, 10, 10), into a finite number of bins (e.g., 2000) to determine the  
58 frequency of each value. The noise usually appears as isolated spikes in these bins because they are primarily  
59 unique points that stand out. By choosing a threshold (like 3), we can ignore bins with counts below this value,  
60 effectively identifying the true minimum and maximum values in the spectrum data. Subsequently, the data  
61 values are truncated to the minimum and maximum and normalized to the range from 0 to 1. This process  
62 eliminates noise and readies the dataset for processing by the image super-resolution model.

63

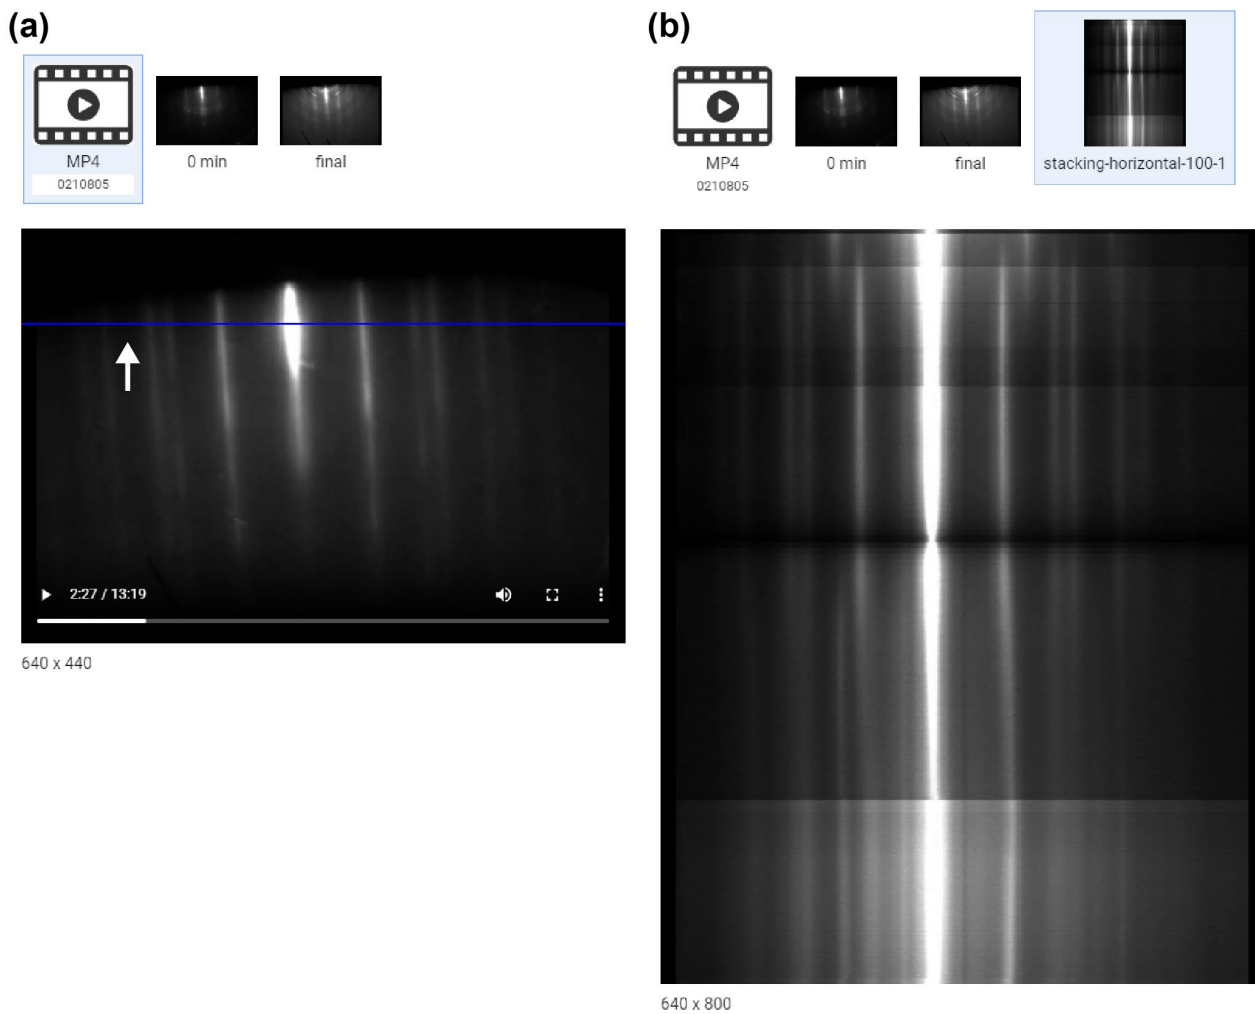

64  
 65 **Figure S1.** The visualization GUI for the RHEED data in the DATA-UOS group showcases the main section  
 66 (a) before and (b) after the addition of a guideline to video data along the horizontal axis at position 100 with a  
 67 1-pixel width. The resulting stacked image is appended to the list, identified as “stacking-horizontal-100-1”.  
 68 The dimensions of the image are 640 by 800, derived from the size of the horizontal axis of video and the  
 69 product of frame count and guideline width. In this instance, spanning 800 frames (13min 20sec) and width of  
 70 1.  
 71

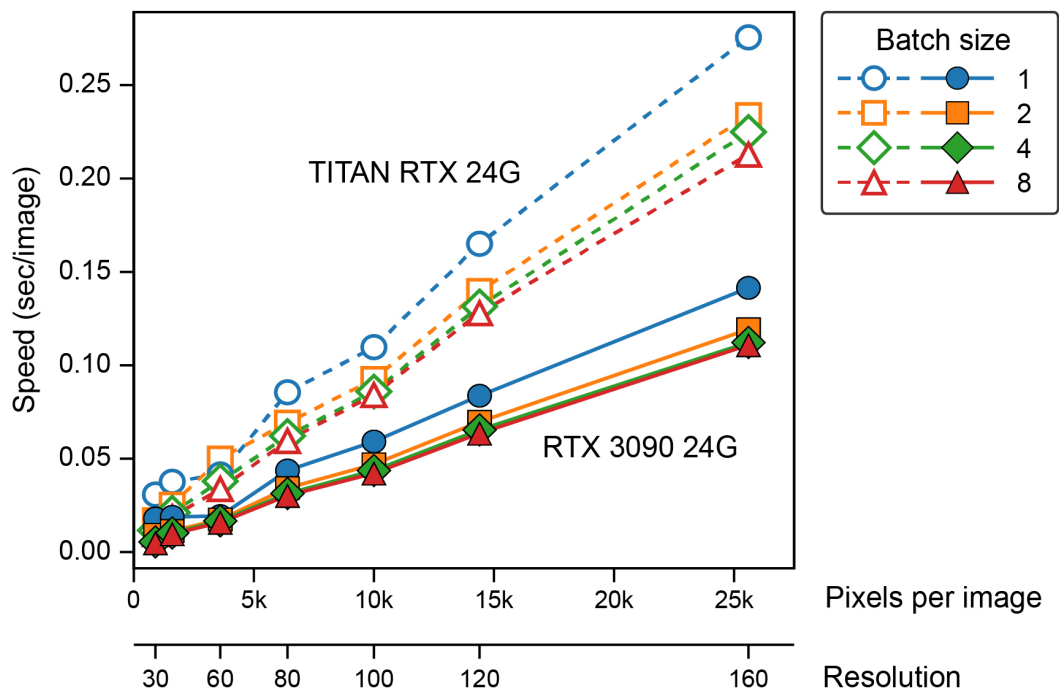

72

73 **Figure S2.** Results of the bench test for the SwinIR super-resolution model using TITAN RTX 24 GB (dashed  
 74 lines) and RTX 3090 24 GB (solid lines) with different batch sizes of 1, 2, 4, and 8, represented by blue circle,  
 75 orange square, green diamond, and red triangle, respectively. The required time to enhance the resolution of the  
 76 image increases linearly with respect to the total pixels of the input image.

77

78 **Table S1.** List of input parameters for DATA-UOS group.

|                                   |                                   |
|-----------------------------------|-----------------------------------|
| UOS sample name                   | effusion cell source1             |
| DB name                           | effusion cell temperature1 (degC) |
| Date                              | effusion cell rate1 (A/sec)       |
| Sample                            | effusion cell source2             |
| Material                          | effusion cell temperature2 (degC) |
| Operator name                     | effusion cell rate2 (A/sec)       |
| Growth rate (1ML duration, min)   | Working pressure (torr)           |
| Base pressure (torr)              | growth temperature (degC)         |
| substrate                         | growth duration (min)             |
| Substrate resistance (Ohm)        | Estimated thickness (monolayer)   |
| Face of substrate                 | Post annealing temperature (degC) |
| Pre-annealing temperature         | Post annealing duration (min)     |
| Pre-annealing duration (min)      | sample RHEED quality              |
| substrate RHEED (Sub or Graphene) | RHEED video frame per sec (fps)   |
| ebeam-source1                     | Capping material                  |
| e-beam flux1 (nA)                 | Capping source temperature (degC) |
| e-beam rate1 (A/sec)              | Capping duration (min)            |
| ebeam-source2                     | Capping thickness (nm)            |
| e-beam flux2 (nA)                 | sample-z (mm)                     |
| e-beam rate2 (A/sec)              | Note                              |

79

80 **Table S2.** Input file form for DATA-POSTECH group.

| Classification | Item              | Details (Value)   | Unit             | Remark |           |
|----------------|-------------------|-------------------|------------------|--------|-----------|
| <b>Sample</b>  | Producer          |                   |                  |        |           |
|                | Date              |                   |                  |        |           |
|                | Sample ID         |                   |                  |        |           |
|                | TMD composition   |                   |                  |        |           |
|                | Stacked structure |                   |                  |        |           |
|                | Polymer Stamp     |                   |                  |        |           |
|                | Method            |                   |                  |        |           |
|                | Substrate         |                   |                  |        |           |
|                | E-beam process    |                   |                  |        |           |
|                | Annealing         | Temperature       |                  | °C     |           |
|                |                   | Atmosphere        |                  |        |           |
|                |                   | Time              |                  | hour   |           |
|                | Laser             | Wavelength        |                  | nm     |           |
|                |                   | Power             |                  | μW     |           |
|                |                   | Atmosphere        |                  |        |           |
| Time           |                   |                   | sec              |        |           |
| <b>Measure</b> | Measurer          |                   |                  |        |           |
|                | Date              |                   |                  |        |           |
|                | Setup             |                   |                  |        |           |
|                | Excitation Laser  | Wavelength        |                  | nm     |           |
|                |                   | Type              |                  |        |           |
|                |                   | Power             |                  | μW     |           |
|                | Mapping condition | Size              |                  | μm     | Square    |
|                |                   | Data point        |                  |        | Square    |
|                |                   | Integration time  |                  | sec    | Per point |
|                | Condition         | Voltage           |                  | V      |           |
| Temperature    |                   |                   | °C               |        |           |
| <b>Fitting</b> | PL                | Center wavelength | nm               |        |           |
|                |                   | Width             | nm               |        |           |
|                |                   | Cutoff count      |                  |        |           |
|                | Raman             | Center frequency  | cm <sup>-1</sup> |        |           |
|                |                   | Width             | cm <sup>-1</sup> |        |           |
|                |                   | Cutoff count      |                  |        |           |

81
